# Supplementary material
Source: PubMed Central journal article supplement (PMC7953341)
Supplement: NIHMS1674499-supplement-Supplemental.pdf [file NIHMS1674499-supplement-Supplemental.pdf]

Supplemental Table 1. Rural-urban category criteria, derived from the USEPA EQI Rural Urban Continuum Category (RUCC) category definitions and Derived Summary Staging as Defined by NC CCR, adapted from SEER

| <b>Rural-Urban Stratification</b>                                                                                                                                                                                                                                                                                                                                                                                                                                                                                 |                                                       |
|-------------------------------------------------------------------------------------------------------------------------------------------------------------------------------------------------------------------------------------------------------------------------------------------------------------------------------------------------------------------------------------------------------------------------------------------------------------------------------------------------------------------|-------------------------------------------------------|
| <b>Rural-Urban Category</b>                                                                                                                                                                                                                                                                                                                                                                                                                                                                                       | <b>Criteria</b>                                       |
| <b>Metropolitan urbanized</b>                                                                                                                                                                                                                                                                                                                                                                                                                                                                                     | EQI RUCC1 "metropolitan urbanized"                    |
| <b>Non-metro urbanized</b>                                                                                                                                                                                                                                                                                                                                                                                                                                                                                        | EQI RUCC2 "non-metro urbanized"                       |
| <b>Less populated</b>                                                                                                                                                                                                                                                                                                                                                                                                                                                                                             | EQI RUCC3 "less urbanized" + RUCC4 "thinly populated" |
| <b>Summary Stage Inclusion Criteria</b>                                                                                                                                                                                                                                                                                                                                                                                                                                                                           |                                                       |
| <b>Carcinoma In Situ</b>                                                                                                                                                                                                                                                                                                                                                                                                                                                                                          |                                                       |
| Noninvasive; intraepithelial, Intraductal WITHOUT infiltration, Lobular neoplasia, Noninfiltrating, In situ Paget disease                                                                                                                                                                                                                                                                                                                                                                                         |                                                       |
| <b>Distant Metastatic Breast Cancer</b>                                                                                                                                                                                                                                                                                                                                                                                                                                                                           |                                                       |
| Distant lymph node(s): Cervical, NOS, Contralateral/bilateral axillary, Contralateral/bilateral internal mammary (parasternal), Supraclavicular (transverse cervical), Other distant lymph node(s), Further contiguous extension: Skin over: Axilla, Contralateral (opposite) breast, Sternum, Upper abdomen, Metastasis: Adrenal (suprarenal) gland, Bone other than adjacent rib, Contralateral (opposite) breast - if stated as metastatic, Lung, Ovary, Satellite nodule(s) in skin other than primary breast |                                                       |

Supplemental Table 2. Individual-level characteristics of women in the analyses [n(%)]

|                             | Carcinoma In Situ |                        |                     |                | Localized Breast Cancer                                           |                        |                                                      |                | Regional Breast Cancer                                           |                        |                     |                | Distant Metastatic Breast Cancer                             |                        |                     |                |
|-----------------------------|-------------------|------------------------|---------------------|----------------|-------------------------------------------------------------------|------------------------|------------------------------------------------------|----------------|------------------------------------------------------------------|------------------------|---------------------|----------------|--------------------------------------------------------------|------------------------|---------------------|----------------|
|                             | Non-stratified    | Metropolitan urbanized | Non-metro urbanized | Less populated | Non-stratified                                                    | Metropolitan urbanized | Non-metro urbanized                                  | Less populated | Non-stratified                                                   | Metropolitan urbanized | Non-metro urbanized | Less populated | Non-stratified                                               | Metropolitan urbanized | Non-metro urbanized | Less populated |
| <b>n</b>                    | 7975              | 5687                   | 1314                | 974            | 25827                                                             | 18091                  | 4561                                                 | 3175           | 12371                                                            | 8513                   | 2310                | 1548           | 2073                                                         | 1428                   | 359                 | 286            |
| <b>EQI</b>                  |                   |                        |                     |                |                                                                   |                        |                                                      |                |                                                                  |                        |                     |                |                                                              |                        |                     |                |
| Quartile 1                  | 4784 (60%)        | 4251 (75%)             | 444 (34%)           | 89 (9%)        | 15150 (59%)<br>5863 (23%)<br>3082 (12%)<br>1732 (7%)              | 13345 (74%)            | 1527 (33%)<br>1870 (41%)                             | 278 (9%)       | 7026 (57%)<br>2850 (23%)<br>1588 (13%)                           | 6150 (72%)             | 736 (32%)           | 140 (9%)       | 1157 (56%)<br>482 (23%)<br>283 (14%)                         | 1020 (71%)             | 118 (33%)           | 19 (7%)        |
| Quartile 2                  | 1791 (22%)        | 968 (17%)              | 543 (41%)           | 280 (29%)      | 3079 (17%)                                                        | 792 (17%)              | 940 (30%)                                            | 907 (7%)       | 1526 (18%)                                                       | 937 (41%)              | 387 (25%)           | 151 (7%)       | 270 (19%)                                                    | 132 (37%)              | 80 (28%)            |                |
| Quartile 3                  | 849 (11%)         | 370 (7%)               | 212 (16%)           | 267 (27%)      | 1350 (7%)                                                         | 317 (2%)               | 372 (8%)                                             | 168 (2%)       | 669 (8%)                                                         | 403 (17%)              | 516 (33%)           | 234 (10%)      | 121 (8%)                                                     | 72 (20%)               | 90 (31%)            |                |
| Quartile 4                  | 551 (7%)          | 98 (2%)                | 115 (9%)            | 338 (35%)      | 317 (2%)                                                          | 372 (8%)               | 336 (10%)                                            | 505 (33%)      | 168 (2%)                                                         | 234 (10%)              | 505 (33%)           | 151 (7%)       | 17 (1%)                                                      | 37 (10%)               | 97 (34%)            |                |
| <b>Air EQI</b>              |                   |                        |                     |                |                                                                   |                        |                                                      |                |                                                                  |                        |                     |                |                                                              |                        |                     |                |
| Quartile 1                  | 5060 (63%)        | 4387 (77%)             | 619 (47%)           | 54 (6%)        | 1627 (63%)<br>4802 (28%)<br>3303 (13%)<br>1505 (6%)               | 13873 (77%)            | 2188 (48%)<br>1452 (32%)<br>1044 (33%)<br>1216 (38%) | 156 (5%)       | 7658 (62%)<br>2371 (19%)<br>1614 (13%)                           | 6431 (76%)             | 1138 (49%)          | 89 (6%)        | 1248 (60%)<br>405 (20%)<br>292 (14%)                         | 1081 (76%)             | 155 (43%)           | 12 (4%)        |
| Quartile 2                  | 1464 (18%)        | 836 (15%)              | 383 (29%)           | 245 (25%)      | 2591 (14%)                                                        | 759 (24%)              | 1044 (33%)                                           | 728 (6%)       | 1312 (15%)                                                       | 732 (32%)              | 327 (21%)           | 112 (1%)       | 215 (15%)                                                    | 122 (34%)              | 68 (24%)            |                |
| Quartile 3                  | 1006 (13%)        | 398 (7%)               | 270 (21%)           | 338 (35%)      | 1445 (8%)                                                         | 814 (18%)              | 107 (2%)                                             | 46 (2%)        | 658 (8%)                                                         | 394 (17%)              | 562 (36%)           | 46 (2%)        | 118 (8%)                                                     | 75 (21%)               | 99 (35%)            |                |
| Quartile 4                  | 445 (6%)          | 66 (1%)                | 42 (3%)             | 337 (35%)      | 182 (1%)                                                          | 107 (2%)               | 38 (3%)                                              | 570 (37%)      | 112 (1%)                                                         | 46 (2%)                | 570 (37%)           | 128 (6%)       | 14 (1%)                                                      | 7 (2%)                 | 107 (37%)           |                |
| <b>Water EQI</b>            |                   |                        |                     |                |                                                                   |                        |                                                      |                |                                                                  |                        |                     |                |                                                              |                        |                     |                |
| Quartile 1                  | 3285 (41%)        | 2577 (45%)             | 433 (33%)           | 275 (28%)      | 10600 (41%)<br>7213 (28%)<br>5714 (22%)<br>2300 (9%)              | 8234 (46%)             | 1486 (33%)<br>661 (14%)<br>1583 (35%)<br>1002 (32%)  | 880 (28%)      | 5121 (41%)<br>3384 (27%)<br>2752 (22%)<br>1114 (9%)              | 3954 (46%)             | 707 (31%)           | 460 (30%)      | 858 (41%)<br>601 (29%)<br>431 (21%)                          | 652 (46%)              | 118 (33%)           | 88 (31%)       |
| Quartile 2                  | 2139 (27%)        | 1705 (30%)             | 190 (14%)           | 244 (25%)      | 5741 (32%)                                                        | 661 (14%)              | 811 (26%)                                            | 2682 (32%)     | 316 (14%)                                                        | 386 (25%)              | 431 (21%)           | 274 (19%)      | 468 (33%)                                                    | 54 (15%)               | 79 (28%)            |                |
| Quartile 3                  | 1828 (23%)        | 1193 (21%)             | 492 (37%)           | 143 (15%)      | 3649 (20%)                                                        | 482 (15%)              | 1002 (32%)                                           | 1667 (20%)     | 843 (36%)                                                        | 242 (16%)              | 431 (21%)           | 274 (19%)      | 117 (33%)                                                    | 40 (14%)               |                     |                |
| Quartile 4                  | 723 (9%)          | 212 (4%)               | 199 (15%)           | 312 (32%)      | 467 (3%)                                                          | 831 (18%)              | 32 (1%)                                              | 210 (2%)       | 444 (19%)                                                        | 460 (30%)              | 183 (9%)            | 34 (2%)        | 70 (19%)                                                     | 79 (28%)               |                     |                |
| <b>Land EQI</b>             |                   |                        |                     |                |                                                                   |                        |                                                      |                |                                                                  |                        |                     |                |                                                              |                        |                     |                |
| Quartile 1                  | 2916 (37%)        | 2242 (39%)             | 394 (30%)           | 280 (29%)      | 9024 (35%)<br>7846 (30%)<br>4175 (16%)<br>4782 (19%)              | 6991 (39%)             | 1257 (28%)<br>964 (21%)<br>1061 (33%)<br>1435 (31%)  | 776 (24%)      | 4163 (34%)<br>3697 (30%)<br>1985 (16%)<br>2526 (20%)             | 3112 (37%)             | 652 (28%)           | 399 (26%)      | 687 (33%)<br>621 (30%)<br>332 (16%)<br>433 (21%)             | 529 (37%)              | 91 (25%)            | 67 (23%)       |
| Quartile 2                  | 2573 (32%)        | 2125 (37%)             | 285 (22%)           | 163 (17%)      | 6327 (35%)                                                        | 964 (21%)              | 555 (17%)                                            | 2968 (35%)     | 482 (21%)                                                        | 247 (16%)              | 478 (31%)           | 228 (16%)      | 503 (35%)                                                    | 80 (22%)               | 38 (13%)            |                |
| Quartile 3                  | 1155 (14%)        | 635 (11%)              | 227 (17%)           | 293 (30%)      | 2209 (12%)                                                        | 905 (20%)              | 1170 (37%)                                           | 1092 (13%)     | 415 (18%)                                                        | 478 (31%)              | 424 (27%)           | 228 (16%)      | 168 (12%)                                                    | 80 (22%)               | 84 (29%)            |                |
| Quartile 4                  | 1331 (17%)        | 685 (12%)              | 408 (31%)           | 238 (24%)      | 2564 (14%)                                                        | 783 (25%)              | 1170 (37%)                                           | 1341 (16%)     | 761 (33%)                                                        | 424 (27%)              | 424 (27%)           | 228 (16%)      | 108 (30%)                                                    | 97 (34%)               |                     |                |
| <b>Sociodemographic EQI</b> |                   |                        |                     |                |                                                                   |                        |                                                      |                |                                                                  |                        |                     |                |                                                              |                        |                     |                |
| Quartile 1                  | 4081 (51%)        | 3606 (63%)             | 396 (30%)           | 79 (8%)        | 12923 (50%)<br>7688 (30%)<br>3101 (12%)<br>2115 (8%)              | 11342 (63%)            | 1354 (30%)<br>1456 (32%)<br>1063 (23%)<br>1170 (37%) | 227 (7%)       | 6065 (49%)<br>3613 (29%)<br>1580 (13%)<br>1113 (9%)              | 5309 (62%)             | 638 (28%)           | 118 (8%)       | 1007 (49%)<br>599 (29%)<br>259 (12%)<br>208 (10%)            | 880 (62%)              | 105 (29%)           | 22 (8%)        |
| Quartile 2                  | 2450 (31%)        | 1798 (32%)             | 468 (36%)           | 184 (19%)      | 5660 (31%)                                                        | 572 (18%)              | 1206 (38%)                                           | 2642 (31%)     | 698 (30%)                                                        | 273 (18%)              | 273 (18%)           | 27 (2%)        | 451 (32%)                                                    | 104 (29%)              | 44 (15%)            |                |
| Quartile 3                  | 847 (11%)         | 210 (4%)               | 264 (20%)           | 373 (38%)      | 832 (5%)                                                          | 876 (28%)              | 1170 (37%)                                           | 418 (5%)       | 584 (25%)                                                        | 578 (37%)              | 578 (37%)           | 27 (2%)        | 70 (5%)                                                      | 81 (23%)               | 108 (38%)           |                |
| Quartile 4                  | 597 (7%)          | 73 (1%)                | 186 (14%)           | 338 (35%)      | 257 (1%)                                                          | 688 (15%)              | 37 (1%)                                              | 144 (2%)       | 390 (17%)                                                        | 579 (37%)              | 579 (37%)           | 27 (2%)        | 27 (2%)                                                      | 69 (19%)               | 112 (39%)           |                |
| <b>Built EQI</b>            |                   |                        |                     |                |                                                                   |                        |                                                      |                |                                                                  |                        |                     |                |                                                              |                        |                     |                |
| Quartile 1                  | 4045 (51%)        | 3515 (62%)             | 297 (23%)           | 233 (24%)      | 12942 (50%)<br>5640 (22%)<br>4744 (18%)<br>2501 (10%)             | 10959 (61%)            | 1142 (25%)<br>1688 (37%)<br>1033 (23%)               | 841 (26%)      | 6018 (49%)<br>2731 (22%)<br>2337 (19%)<br>1285 (10%)             | 5078 (60%)             | 568 (25%)           | 372 (24%)      | 995 (48%)<br>434 (21%)<br>437 (21%)<br>207 (10%)             | 835 (58%)              | 94 (26%)            | 66 (23%)       |
| Quartile 2                  | 1784 (22%)        | 1002 (18%)             | 545 (41%)           | 237 (24%)      | 3213 (18%)                                                        | 739 (23%)              | 876 (28%)                                            | 1553 (18%)     | 831 (36%)                                                        | 347 (22%)              | 347 (22%)           | 27 (2%)        | 245 (17%)                                                    | 128 (36%)              | 61 (21%)            |                |
| Quartile 3                  | 1344 (17%)        | 837 (15%)              | 245 (19%)           | 262 (27%)      | 2835 (16%)                                                        | 876 (28%)              | 1170 (37%)                                           | 1321 (16%)     | 551 (24%)                                                        | 465 (30%)              | 465 (30%)           | 27 (2%)        | 255 (18%)                                                    | 90 (25%)               | 92 (32%)            |                |
| Quartile 4                  | 802 (10%)         | 333 (6%)               | 227 (17%)           | 242 (25%)      | 1084 (6%)                                                         | 698 (15%)              | 719 (23%)                                            | 561 (7%)       | 360 (16%)                                                        | 364 (24%)              | 364 (24%)           | 27 (2%)        | 93 (7%)                                                      | 47 (13%)               | 67 (23%)            |                |
| <b>BMI</b>                  |                   |                        |                     |                |                                                                   |                        |                                                      |                |                                                                  |                        |                     |                |                                                              |                        |                     |                |
| Underweight                 | 37 (0%)           | 25 (0%)                | 10 (1%)             | 2 (<1%)        | 201 (1%)<br>3019 (12%)<br>3447 (13%)<br>4563 (18%)<br>14597 (57%) | 139 (1%)               | 35 (1%)                                              | 27 (1%)        | 107 (1%)<br>1423 (12%)<br>1599 (13%)<br>2415 (20%)<br>8827 (55%) | 68 (1%)                | 22 (1%)             | 17 (1%)        | 22 (1%)<br>207 (10%)<br>291 (14%)<br>415 (20%)<br>1138 (55%) | 17 (1%)                | 2 (1%)              | 3 (1%)         |
| Normal weight               | 753 (9%)          | 582 (10%)              | 101 (8%)            | 70 (7%)        | 2215 (12%)                                                        | 484 (11%)              | 320 (10%)                                            | 1020 (12%)     | 237 (10%)                                                        | 166 (11%)              | 166 (11%)           | 17 (1%)        | 150 (11%)                                                    | 33 (9%)                | 24 (8%)             |                |
| Overweight                  | 950 (12%)         | 710 (12%)              | 133 (10%)           | 107 (11%)      | 2459 (14%)                                                        | 545 (12%)              | 443 (14%)                                            | 1134 (13%)     | 281 (12%)                                                        | 184 (12%)              | 184 (12%)           | 27 (2%)        | 210 (15%)                                                    | 37 (10%)               | 44 (15%)            |                |
| Obese                       | 1408 (18%)        | 953 (17%)              | 263 (20%)           | 192 (20%)      | 3211 (18%)                                                        | 811 (18%)              | 541 (17%)                                            | 1689 (20%)     | 412 (18%)                                                        | 314 (20%)              | 314 (20%)           | 27 (2%)        | 294 (21%)                                                    | 65 (18%)               | 56 (20%)            |                |
| Unknown                     | 4827 (61%)        | 3417 (60%)             | 807 (61%)           | 603 (62%)      | 10067 (56%)                                                       | 2686 (59%)             | 1844 (58%)                                           | 4602 (54%)     | 1358 (53%)                                                       | 867 (56%)              | 867 (56%)           | 27 (2%)        | 757 (53%)                                                    | 222 (62%)              | 159 (56%)           |                |

| Age            |            |            |            |           |             |             |            |            |            |            |            |            |            |           |           |           |
|----------------|------------|------------|------------|-----------|-------------|-------------|------------|------------|------------|------------|------------|------------|------------|-----------|-----------|-----------|
| Average Age    | 60.3       | 60.0       | 61.1       | 61.4      | 62.2        | 61.8        | 63.1       | 63.5       | 59.1       | 58.6       | 60.2       | 60.5       | 60.9       | 60.1      | 62.3      | 62.8      |
| Race           |            |            |            |           |             |             |            |            |            |            |            |            |            |           |           |           |
| White          | 6174 (77%) | 4393 (77%) | 1048 (80%) | 733 (75%) | 20570 (80%) | 14284 (79%) | 3733 (82%) | 2553 (80%) | 9070 (73%) | 6143 (72%) | 1758 (76%) | 1169 (76%) | 1397 (67%) | 955 (67%) | 253 (70%) | 189 (66%) |
| Black          | 1577 (20%) | 1138 (20%) | 216 (16%)  | 223 (23%) | 4542 (18%)  | 3290 (18%)  | 700 (15%)  | 552 (17%)  | 2945 (24%) | 2120 (25%) | 483 (21%)  | 342 (22%)  | 607 (29%)  | 431 (30%) | 87 (24%)  | 89 (31%)  |
| Other          | 224 (3%)   | 156 (3%)   | 50 (4%)    | 18 (2%)   | 715 (2%)    | 517 (3%)    | 128 (3%)   | 70 (3%)    | 356 (3%)   | 250 (3%)   | 69 (3%)    | 37 (2%)    | 69 (4%)    | 42 (3%)   | 19 (6%)   | 8 (3%)    |
| Smoking        |            |            |            |           |             |             |            |            |            |            |            |            |            |           |           |           |
| Current smoker | 364 (5%)   | 253 (4%)   | 64 (5%)    | 47 (5%)   | 1550 (6%)   | 1011 (6%)   | 337 (7%)   | 202 (6%)   | 949 (8%)   | 630 (7%)   | 190 (8%)   | 129 (8%)   | 205 (10%)  | 145 (10%) | 40 (11%)  | 20 (7%)   |
| Former smoker  | 795 (10%)  | 571 (10%)  | 136 (10%)  | 88 (9%)   | 3076 (12%)  | 2236 (12%)  | 495 (11%)  | 345 (11%)  | 1471 (12%) | 1041 (12%) | 244 (11%)  | 186 (12%)  | 219 (11%)  | 148 (10%) | 43 (12%)  | 28 (10%)  |
| Never smoked   | 2351 (29%) | 1680 (30%) | 391 (30%)  | 280 (29%) | 7696 (30%)  | 5423 (30%)  | 1324 (29%) | 949 (30%)  | 6272 (51%) | 2566 (30%) | 664 (29%)  | 449 (29%)  | 653 (32%)  | 466 (33%) | 92 (26%)  | 95 (33%)  |
| Unknown        | 4465 (56%) | 3183 (56%) | 723 (55%)  | 559 (57%) | 13505 (52%) | 9421 (52%)  | 2405 (53%) | 1679 (53%) | 3679 (30%) | 4276 (50%) | 1212 (52%) | 784 (51%)  | 996 (48%)  | 669 (47%) | 184 (51%) | 143 (50%) |

\*Other Race = American Indian, Asian, Native Hawaiian or Pacific Islander, Other, Unknown

Supplemental Table 3. Odds ratios (95% CI) for localized, regional, or distant metastatic breast cancer versus carcinoma in situ based on individual environmental quality index domain indices (Air, Water, Land, Sociodemographic, and Built domains) by urban/rural continuum codes (metropolitan urbanized, non-metro urbanized, less populated) using quartile 1 (worst environmental domain quality) as reference. Models were adjusted for individual age at diagnosis, BMI, smoking status, race, and all other domains.

|                             | Localized Breast Cancer |                         |                         |                         | Regional Breast Cancer  |                         |                         |                         | Distant Metastatic Breast Cancer |                         |                         |                         |
|-----------------------------|-------------------------|-------------------------|-------------------------|-------------------------|-------------------------|-------------------------|-------------------------|-------------------------|----------------------------------|-------------------------|-------------------------|-------------------------|
|                             | Non-stratified          | Metropolitan urbanized  | Non-metro urbanized     | Less Populated          | Non-stratified          | Metropolitan urbanized  | Non-metro urbanized     | Less Populated          | Non-stratified                   | Metropolitan urbanized  | Non-metro urbanized     | Less Populated          |
| <b>air EQI</b>              |                         |                         |                         |                         |                         |                         |                         |                         |                                  |                         |                         |                         |
| First Quartile              | 1.00 (reference)                 | 1.00 (reference)        | 1.00 (reference)        | 1.00 (reference)        |
| Second Quartile             | 0.98 (0.96-1.01)        | 0.98 (0.96-1.01)        | 1.00 (0.96-1.04)        | <b>0.93 (0.88-0.99)</b> | 0.98 (0.95-1.01)        | 1.00 (0.96-1.04)        | 0.99 (0.95-1.04)        | <b>0.78 (0.73-0.84)</b> | 1.00 (0.97-1.04)                 | 0.98 (0.93-1.03)        | 1.05 (0.98-1.12)        | 0.90 (0.81-1.01)        |
| Third Quartile              | 0.98 (0.95-1.00)        | 1.00 (0.98-1.03)        | <b>0.89 (0.83-0.95)</b> | <b>0.94 (0.89-0.99)</b> | 0.97 (0.93-1.01)        | 0.99 (0.96-1.03)        | <b>0.89 (0.81-0.97)</b> | <b>0.84 (0.79-0.9)</b>  | 1.00 (0.96-1.04)                 | 0.99 (0.93-1.05)        | 0.88 (0.78-1.00)        | 0.91 (0.83-1.01)        |
| Fourth Quartile             | 0.97 (0.95-1.00)        | 0.95 (0.91-1.00)        | <b>0.91 (0.85-0.96)</b> | 0.93 (0.86-1.01)        | 0.96 (0.92-1.00)        | 1.00 (0.94-1.05)        | <b>0.87 (0.81-0.93)</b> | <b>0.8 (0.72-0.88)</b>  | 0.99 (0.95-1.03)                 | 0.94 (0.86-1.03)        | 0.95 (0.85-1.07)        | 0.89 (0.77-1.03)        |
| <i>p-trend</i>              | 0.144                   | 0.649                   | 0.051                   | 0.201                   | 0.102                   | 0.968                   | <b>0.006</b>            | 0.451                   | 0.937                            | 0.499                   | 0.883                   | 0.846                   |
| <b>water EQI</b>            |                         |                         |                         |                         |                         |                         |                         |                         |                                  |                         |                         |                         |
| First Quartile              | 1.00 (reference)                 | 1.00 (reference)        | 1.00 (reference)        | 1.00 (reference)        |
| Second Quartile             | 1.01 (0.98-1.03)        | 1.00 (0.98-1.03)        | 0.99 (0.96-1.03)        | 1.02 (0.99-1.06)        | 1.00 (0.96-1.03)        | 1.01 (0.97-1.05)        | 0.97 (0.93-1.01)        | 1.02 (0.96-1.08)        | 1.00 (0.97-1.03)                 | 1.01 (0.97-1.05)        | 0.95 (0.91-1.00)        | 1.02 (0.94-1.11)        |
| Third Quartile              | 0.99 (0.97-1.01)        | 0.98 (0.96-1.00)        | 0.98 (0.94-1.01)        | 1.02 (0.98-1.06)        | 0.98 (0.95-1.02)        | 0.97 (0.94-1.01)        | 1.02 (0.98-1.05)        | 1.02 (0.95-1.08)        | 0.98 (0.95-1.01)                 | 0.99 (0.96-1.03)        | 0.97 (0.90-1.03)        | 0.93 (0.86-1.01)        |
| Fourth Quartile             | 0.98 (0.94-1.01)        | <b>0.94 (0.89-0.98)</b> | 1.02 (0.95-1.09)        | 1.00 (0.97-1.04)        | 0.96 (0.91-1.00)        | <b>0.91 (0.85-0.97)</b> | 1.05 (0.97-1.14)        | 0.98 (0.93-1.04)        | 0.95 (0.92-1.00)                 | 0.95 (0.90-1.02)        | 1.03 (0.89-1.19)        | 0.95 (0.88-1.02)        |
| <i>p-trend</i>              | 0.646                   | 0.351                   | 0.255                   | 0.454                   | 0.587                   | 0.414                   | <b>0.046</b>            | 0.538                   | 0.199                            | 0.547                   | 0.491                   | 0.198                   |
| <b>land EQI</b>             |                         |                         |                         |                         |                         |                         |                         |                         |                                  |                         |                         |                         |
| First Quartile              | 1.00 (reference)                 | 1.00 (reference)        | 1.00 (reference)        | 1.00 (reference)        |
| Second Quartile             | 1.00 (0.97-1.03)        | 0.99 (0.96-1.02)        | 1.01 (0.96-1.06)        | <b>1.05 (1.01-1.10)</b> | 1.00 (0.94-1.06)        | 1.00 (0.95-1.06)        | 0.98 (0.92-1.04)        | <b>1.05 (1.00-1.11)</b> | 1.00 (0.97-1.04)                 | 1.01 (0.97-1.05)        | 0.99 (0.91-1.07)        | 1.00 (0.93-1.08)        |
| Third Quartile              | <b>1.02 (1.00-1.05)</b> | 1.01 (0.98-1.04)        | <b>1.06 (1.01-1.11)</b> | <b>1.07 (1.02-1.11)</b> | <b>1.05 (1.01-1.09)</b> | <b>1.05 (1.00-1.10)</b> | 1.00 (0.95-1.06)        | <b>1.09 (1.03-1.16)</b> | 1.02 (0.99-1.06)                 | 1.01 (0.97-1.06)        | 1.07 (0.98-1.16)        | 1.06 (0.98-1.15)        |
| Fourth Quartile             | <b>1.03 (1.00-1.05)</b> | <b>1.03 (1.01-1.06)</b> | 1.01 (0.96-1.06)        | <b>1.05 (1.01-1.09)</b> | <b>1.05 (1.01-1.09)</b> | <b>1.08 (1.03-1.12)</b> | 0.96 (0.91-1.02)        | <b>1.06 (1.01-1.12)</b> | 1.02 (0.98-1.06)                 | <b>1.05 (1.00-1.10)</b> | <b>0.92 (0.85-0.99)</b> | <b>1.08 (1.01-1.16)</b> |
| <i>p-trend</i>              | <b>0.006</b>            | 0.053                   | 0.161                   | <b>0.014</b>            | <b>0.001</b>            | <b>0.001</b>            | 0.503                   | 0.124                   | 0.109                            | 0.102                   | 0.66                    | <b>0.013</b>            |
| <b>sociodemographic EQI</b> |                         |                         |                         |                         |                         |                         |                         |                         |                                  |                         |                         |                         |
| First Quartile              | 1.00 (reference)                 | 1.00 (reference)        | 1.00 (reference)        | 1.00 (reference)        |
| Second Quartile             | 0.99 (0.97-1.01)        | 0.98 (0.96-1.01)        | 0.94 (0.89-1.00)        | 0.97 (0.92-1.03)        | 0.98 (0.95-1.01)        | 0.97 (0.94-1.01)        | 0.95 (0.88-1.02)        | <b>0.88 (0.82-0.95)</b> | 0.99 (0.96-1.01)                 | 0.99 (0.96-1.02)        | <b>0.91 (0.83-0.99)</b> | <b>0.85 (0.77-0.94)</b> |
| Third Quartile              | <b>1.02 (1.00-1.05)</b> | 1.01 (0.98-1.04)        | 0.95 (0.89-1.01)        | 1.01 (0.95-1.08)        | <b>1.04 (1.00-1.08)</b> | 0.97 (0.92-1.02)        | 1.01 (0.93-1.09)        | 0.99 (0.94-1.04)        | 1.02 (0.98-1.06)                 | 0.99 (0.92-1.07)        | 0.93 (0.83-1.05)        | 0.93 (0.85-1.01)        |
| Fourth Quartile             | 1.01 (0.98-1.04)        | 1.01 (0.95-1.08)        | 1.00 (0.95-1.06)        | 1.02 (0.96-1.09)        | 1.03 (0.99-1.07)        | 1.00 (0.93-1.08)        | <b>1.08 (1.01-1.16)</b> | 0.99 (0.93-1.05)        | 1.02 (0.98-1.05)                 | 1.01 (0.94-1.08)        | 1.07 (0.98-1.16)        | 0.93 (0.86-1.01)        |
| <i>p-trend</i>              | 0.295                   | 0.711                   | 0.657                   | 0.759                   | 0.152                   | 0.496                   | <b>0.026</b>            | 0.856                   | 0.39                             | 0.614                   | 0.191                   | 0.971                   |
| <b>built EQI</b>            |                         |                         |                         |                         |                         |                         |                         |                         |                                  |                         |                         |                         |
| First Quartile              | 1.00 (reference)                 | 1.00 (reference)        | 1.00 (reference)        | 1.00 (reference)        |
| Second Quartile             | 0.99 (0.97-1.01)        | 0.99 (0.97-1.02)        | 1.00 (0.94-1.07)        | 0.96 (0.92-1.00)        | 1.00 (0.97-1.04)        | 1.01 (0.97-1.06)        | 0.97 (0.9-1.06)         | <b>0.92 (0.86-0.98)</b> | 0.99 (0.96-1.02)                 | 1.00 (0.97-1.03)        | 1.05 (0.94-1.16)        | 0.93 (0.85-1.02)        |

|                 |                  |                  |                  |                  |                  |                  |                         |                  |                         |                  |                  |                  |
|-----------------|------------------|------------------|------------------|------------------|------------------|------------------|-------------------------|------------------|-------------------------|------------------|------------------|------------------|
| Third Quartile  | 1.01 (0.98-1.03) | 1.00 (0.98-1.02) | 1.01 (0.96-1.06) | 0.97 (0.94-1.01) | 1.03 (0.99-1.07) | 1.01 (0.97-1.04) | 0.97 (0.9-1.03)         | 1.01 (0.97-1.05) | <b>1.04 (1.00-1.07)</b> | 1.03 (0.99-1.07) | 1.01 (0.90-1.14) | 1.00 (0.94-1.08) |
| Fourth Quartile | 0.99 (0.97-1.01) | 1.01 (0.97-1.04) | 1.00 (0.95-1.05) | 0.96 (0.93-1.00) | 1.02 (0.99-1.05) | 1.03 (0.97-1.09) | <b>0.93 (0.87-0.99)</b> | 0.95 (0.9-1.01)  | 1.00 (0.97-1.04)        | 1.03 (0.98-1.09) | 1.01 (0.92-1.12) | 0.96 (0.90-1.03) |
| <i>p-trend</i>  | 0.957            | 0.413            | 0.07             | 0.067            | 0.255            | 0.199            | <b>0.01</b>             | 0.884            | 0.207                   | <b>0.028</b>     | 0.145            | 0.961            |

\*Bolded values are p<0.05

Supplemental Table 4. Unadjusted and adjusted odds ratios (95% CI) for localized, regional, or distant metastatic breast cancer versus carcinoma in situ based on sociodemographic environmental quality index by urban/rural continuum codes (metropolitan urbanized, non-metro urbanized, less populated) using quartile 1 (worst environmental domain quality) as reference. Adjusted models were adjusted for individual age at diagnosis, BMI, smoking status, and race.

|                                                                | Not Adjusted (OR, 95% CI) |                        |                         |                         | Adjusted for Individual Age, BMI, Smoking Status, and Race (aOR, 95% CI) |                        |                         |                         |
|----------------------------------------------------------------|---------------------------|------------------------|-------------------------|-------------------------|--------------------------------------------------------------------------|------------------------|-------------------------|-------------------------|
|                                                                | Non-stratified            | Metropolitan urbanized | Non-metro urbanized     | Less Populated          | Non-stratified                                                           | Metropolitan urbanized | Non-metro urbanized     | Less Populated          |
| <b>Localized Breast Cancer - Sociodemographic EQI</b>          |                           |                        |                         |                         |                                                                          |                        |                         |                         |
| First Quartile                                                 | 1.00 (reference)          | 1.00 (reference)       | 1.00 (reference)        | 1.00 (reference)        | 1.00 (reference)                                                         | 1.00 (reference)       | 1.00 (reference)        | 1.00 (reference)        |
| Second Quartile                                                | 0.99 (0.98-1.01)          | 0.99 (0.97-1.01)       | 0.95 (0.90-1.01)        | 0.97 (0.92-1.03)        | 0.99 (0.97-1.01)                                                         | 0.98 (0.96-1.01)       | 0.94 (0.89-1.00)        | 0.97 (0.92-1.03)        |
| Third Quartile                                                 | <b>1.03 (1.00-1.05)</b>   | 1.01 (0.99-1.04)       | 0.94 (0.88-1.01)        | 1.01 (0.96-1.06)        | <b>1.02 (1.00-1.05)</b>                                                  | 1.01 (0.98-1.04)       | 0.95 (0.89-1.01)        | 1.01 (0.95-1.08)        |
| Fourth Quartile                                                | 1.01 (0.98-1.04)          | 1.01 (0.95-1.08)       | 1.00 (0.94-1.06)        | 1.01 (0.97-1.07)        | 1.01 (0.98-1.04)                                                         | 1.01 (0.95-1.08)       | 1.00 (0.95-1.06)        | 1.02 (0.96-1.09)        |
| <b>Regional Breast Cancer - Sociodemographic EQI</b>           |                           |                        |                         |                         |                                                                          |                        |                         |                         |
| First Quartile                                                 | 1.00 (reference)          | 1.00 (reference)       | 1.00 (reference)        | 1.00 (reference)        | 1.00 (reference)                                                         | 1.00 (reference)       | 1.00 (reference)        | 1.00 (reference)        |
| Second Quartile                                                | 0.98 (0.95-1.01)          | 0.97 (0.93-1.01)       | 0.96 (0.90-1.04)        | <b>0.88 (0.82-0.95)</b> | 0.98 (0.95-1.01)                                                         | 0.97 (0.94-1.01)       | 0.95 (0.88-1.02)        | <b>0.88 (0.82-0.95)</b> |
| Third Quartile                                                 | <b>1.04 (1.00-1.08)</b>   | 0.97 (0.92-1.03)       | 1.03 (0.94-1.12)        | 0.98 (0.93-1.04)        | <b>1.04 (1.00-1.08)</b>                                                  | 0.97 (0.92-1.02)       | 1.01 (0.93-1.09)        | 0.99 (0.94-1.04)        |
| Fourth Quartile                                                | <b>1.04 (0.99-1.08)</b>   | 1.02 (0.94-1.11)       | <b>1.09 (1.01-1.17)</b> | 0.99 (0.93-1.05)        | 1.03 (0.99-1.07)                                                         | 1.00 (0.93-1.08)       | <b>1.08 (1.01-1.16)</b> | 0.99 (0.93-1.05)        |
| <b>Distant Metastatic Breast Cancer - Sociodemographic EQI</b> |                           |                        |                         |                         |                                                                          |                        |                         |                         |
| First Quartile                                                 | 1.00 (reference)          | 1.00 (reference)       | 1.00 (reference)        | 1.00 (reference)        | 1.00 (reference)                                                         | 1.00 (reference)       | 1.00 (reference)        | 1.00 (reference)        |
| Second Quartile                                                | 0.98 (0.95-1.01)          | 0.98 (0.95-1.02)       | 0.94 (0.85-1.03)        | <b>0.85 (0.76-0.94)</b> | 0.99 (0.96-1.01)                                                         | 0.99 (0.96-1.02)       | <b>0.91 (0.83-0.99)</b> | <b>0.85 (0.77-0.94)</b> |
| Third Quartile                                                 | 1.03 (0.99-1.07)          | 1.01 (0.93-1.09)       | 0.98 (0.86-1.11)        | 0.94 (0.86-1.03)        | 1.02 (0.98-1.06)                                                         | 0.99 (0.92-1.07)       | 0.93 (0.83-1.05)        | 0.93 (0.85-1.01)        |
| Fourth Quartile                                                | <b>1.04 (1.00-1.08)</b>   | 1.05 (0.97-1.13)       | <b>1.10 (1.00-1.20)</b> | 0.94 (0.87-1.02)        | 1.02 (0.98-1.05)                                                         | 1.01 (0.94-1.08)       | 1.07 (0.98-1.16)        | 0.93 (0.86-1.01)        |

\*Bolded values are p<0.05

Supplemental Table 5. Total and domain-specific EQI value range across the United States compared to North Carolina

Minimum and maximum EQI values are reported for total and domain-specific EQI across the U.S. and North Carolina. The percent EQI range of North Carolina compared to the U.S. is also reported.

|                             | United States |      | North Carolina |      |               |
|-----------------------------|---------------|------|----------------|------|---------------|
|                             | Min           | Max  | Min            | Max  | % of US Range |
| <b>EQI</b>                  | -5.88         | 2.85 | -1.17          | 1.71 | 33.0%         |
| <b>Air EQI</b>              | -3.26         | 2.79 | -1.44          | 1.80 | 53.5%         |
| <b>Water EQI</b>            | -1.64         | 1.48 | 0.10           | 1.14 | 33.2%         |
| <b>Land EQI</b>             | -5.21         | 2.09 | -1.38          | 0.56 | 26.6%         |
| <b>Sociodemographic EQI</b> | -4.81         | 3.98 | -1.32          | 1.57 | 33.0%         |
| <b>Built EQI</b>            | -6.09         | 3.88 | -3.00          | 1.41 | 44.2%         |

## Supplemental Figure 1. Environmental quality index data sources and factors

Summary of data sources and individual factors comprising the five environmental quality domains [1].

| Total Environmental Quality Index (EQI)                                                                                                                                                                                                                                                                                                                                                                                                                                                                                                                                                                                                                                                                                                                                                                                                                                                                                                                                                                                                                                                                                                                                                                                                                                              |                                                                                                                                                                                                                                                                                                                                                                                                                                                                                                                                                                                                                                                                                                                                                                                                                                                                                                                                                                                                                                                                                                                                                                                                                     |                                                                                                                                                                                                                                                                                                                                                                                                                                                                                                                                                                                                                                                                                                                                                                                                                                                                                                                                                                                                                                                                                                                                                                                     |                                                                                                                                                                                                                                                                                                                                                                                                                                                                                                                                                                                                                                                                                                                                                                                                                                                                                                                                                                                                                                                                                                                                                                                                     |                                                                                                                                                                                                                                                                                                                                                                                                                                                                                                                                                                                                                                                                                                                                                                                                                                                                                                                                                                                                                                                                                                                                                                                                                                                                                                                                                                                                                                                                                                                                                                                                                                                                                                                                                                                                                                                                                                                                                                                                                                                                                                                                                                                                                                                          |
|--------------------------------------------------------------------------------------------------------------------------------------------------------------------------------------------------------------------------------------------------------------------------------------------------------------------------------------------------------------------------------------------------------------------------------------------------------------------------------------------------------------------------------------------------------------------------------------------------------------------------------------------------------------------------------------------------------------------------------------------------------------------------------------------------------------------------------------------------------------------------------------------------------------------------------------------------------------------------------------------------------------------------------------------------------------------------------------------------------------------------------------------------------------------------------------------------------------------------------------------------------------------------------------|---------------------------------------------------------------------------------------------------------------------------------------------------------------------------------------------------------------------------------------------------------------------------------------------------------------------------------------------------------------------------------------------------------------------------------------------------------------------------------------------------------------------------------------------------------------------------------------------------------------------------------------------------------------------------------------------------------------------------------------------------------------------------------------------------------------------------------------------------------------------------------------------------------------------------------------------------------------------------------------------------------------------------------------------------------------------------------------------------------------------------------------------------------------------------------------------------------------------|-------------------------------------------------------------------------------------------------------------------------------------------------------------------------------------------------------------------------------------------------------------------------------------------------------------------------------------------------------------------------------------------------------------------------------------------------------------------------------------------------------------------------------------------------------------------------------------------------------------------------------------------------------------------------------------------------------------------------------------------------------------------------------------------------------------------------------------------------------------------------------------------------------------------------------------------------------------------------------------------------------------------------------------------------------------------------------------------------------------------------------------------------------------------------------------|-----------------------------------------------------------------------------------------------------------------------------------------------------------------------------------------------------------------------------------------------------------------------------------------------------------------------------------------------------------------------------------------------------------------------------------------------------------------------------------------------------------------------------------------------------------------------------------------------------------------------------------------------------------------------------------------------------------------------------------------------------------------------------------------------------------------------------------------------------------------------------------------------------------------------------------------------------------------------------------------------------------------------------------------------------------------------------------------------------------------------------------------------------------------------------------------------------|----------------------------------------------------------------------------------------------------------------------------------------------------------------------------------------------------------------------------------------------------------------------------------------------------------------------------------------------------------------------------------------------------------------------------------------------------------------------------------------------------------------------------------------------------------------------------------------------------------------------------------------------------------------------------------------------------------------------------------------------------------------------------------------------------------------------------------------------------------------------------------------------------------------------------------------------------------------------------------------------------------------------------------------------------------------------------------------------------------------------------------------------------------------------------------------------------------------------------------------------------------------------------------------------------------------------------------------------------------------------------------------------------------------------------------------------------------------------------------------------------------------------------------------------------------------------------------------------------------------------------------------------------------------------------------------------------------------------------------------------------------------------------------------------------------------------------------------------------------------------------------------------------------------------------------------------------------------------------------------------------------------------------------------------------------------------------------------------------------------------------------------------------------------------------------------------------------------------------------------------------------|
| Air Index                                                                                                                                                                                                                                                                                                                                                                                                                                                                                                                                                                                                                                                                                                                                                                                                                                                                                                                                                                                                                                                                                                                                                                                                                                                                            | Water Index                                                                                                                                                                                                                                                                                                                                                                                                                                                                                                                                                                                                                                                                                                                                                                                                                                                                                                                                                                                                                                                                                                                                                                                                         | Land Index                                                                                                                                                                                                                                                                                                                                                                                                                                                                                                                                                                                                                                                                                                                                                                                                                                                                                                                                                                                                                                                                                                                                                                          | Sociodemographic Index                                                                                                                                                                                                                                                                                                                                                                                                                                                                                                                                                                                                                                                                                                                                                                                                                                                                                                                                                                                                                                                                                                                                                                              | Built Index                                                                                                                                                                                                                                                                                                                                                                                                                                                                                                                                                                                                                                                                                                                                                                                                                                                                                                                                                                                                                                                                                                                                                                                                                                                                                                                                                                                                                                                                                                                                                                                                                                                                                                                                                                                                                                                                                                                                                                                                                                                                                                                                                                                                                                              |
| <b>Sources of Data</b>                                                                                                                                                                                                                                                                                                                                                                                                                                                                                                                                                                                                                                                                                                                                                                                                                                                                                                                                                                                                                                                                                                                                                                                                                                                               |                                                                                                                                                                                                                                                                                                                                                                                                                                                                                                                                                                                                                                                                                                                                                                                                                                                                                                                                                                                                                                                                                                                                                                                                                     |                                                                                                                                                                                                                                                                                                                                                                                                                                                                                                                                                                                                                                                                                                                                                                                                                                                                                                                                                                                                                                                                                                                                                                                     |                                                                                                                                                                                                                                                                                                                                                                                                                                                                                                                                                                                                                                                                                                                                                                                                                                                                                                                                                                                                                                                                                                                                                                                                     |                                                                                                                                                                                                                                                                                                                                                                                                                                                                                                                                                                                                                                                                                                                                                                                                                                                                                                                                                                                                                                                                                                                                                                                                                                                                                                                                                                                                                                                                                                                                                                                                                                                                                                                                                                                                                                                                                                                                                                                                                                                                                                                                                                                                                                                          |
| <ul style="list-style-type: none"> <li>Air Quality System</li> <li>National-Scale Air Toxics Assessment</li> </ul>                                                                                                                                                                                                                                                                                                                                                                                                                                                                                                                                                                                                                                                                                                                                                                                                                                                                                                                                                                                                                                                                                                                                                                   | <ul style="list-style-type: none"> <li>Watershed Assessment, Tracking and Environmental Results Program Database/Reach Address Database</li> <li>National Contaminant Occurrence Database</li> <li>Estimates of Water Use in the United States</li> <li>Drought Monitor Data</li> <li>National Atmospheric Deposition Program</li> </ul>                                                                                                                                                                                                                                                                                                                                                                                                                                                                                                                                                                                                                                                                                                                                                                                                                                                                            | <ul style="list-style-type: none"> <li>National Pesticide Use Database</li> <li>Census of Agriculture Full Report</li> <li>EPA Geospatial Data Download Service</li> <li>National Geochemical Survey</li> <li>Map of Radon Zones</li> </ul>                                                                                                                                                                                                                                                                                                                                                                                                                                                                                                                                                                                                                                                                                                                                                                                                                                                                                                                                         | <ul style="list-style-type: none"> <li>U.S. Census</li> <li>Uniform Crime Reports</li> </ul>                                                                                                                                                                                                                                                                                                                                                                                                                                                                                                                                                                                                                                                                                                                                                                                                                                                                                                                                                                                                                                                                                                        | <ul style="list-style-type: none"> <li>Dun and Bradstreet North American Industry Classification System codes</li> <li>Topologically Integrated Geographic Encoding and Referencing</li> <li>Fatality Annual Reporting System</li> <li>Housing and Urban Development Data</li> </ul>                                                                                                                                                                                                                                                                                                                                                                                                                                                                                                                                                                                                                                                                                                                                                                                                                                                                                                                                                                                                                                                                                                                                                                                                                                                                                                                                                                                                                                                                                                                                                                                                                                                                                                                                                                                                                                                                                                                                                                     |
| <b>Individual Factors</b>                                                                                                                                                                                                                                                                                                                                                                                                                                                                                                                                                                                                                                                                                                                                                                                                                                                                                                                                                                                                                                                                                                                                                                                                                                                            |                                                                                                                                                                                                                                                                                                                                                                                                                                                                                                                                                                                                                                                                                                                                                                                                                                                                                                                                                                                                                                                                                                                                                                                                                     |                                                                                                                                                                                                                                                                                                                                                                                                                                                                                                                                                                                                                                                                                                                                                                                                                                                                                                                                                                                                                                                                                                                                                                                     |                                                                                                                                                                                                                                                                                                                                                                                                                                                                                                                                                                                                                                                                                                                                                                                                                                                                                                                                                                                                                                                                                                                                                                                                     |                                                                                                                                                                                                                                                                                                                                                                                                                                                                                                                                                                                                                                                                                                                                                                                                                                                                                                                                                                                                                                                                                                                                                                                                                                                                                                                                                                                                                                                                                                                                                                                                                                                                                                                                                                                                                                                                                                                                                                                                                                                                                                                                                                                                                                                          |
| <p><b>AIR DOMAIN</b></p> <ul style="list-style-type: none"> <li>Particulate matter under-10 µm in aerodynamic diameter</li> <li>Particulate matter under-2.5 µm in aerodynamic diameter</li> <li>Nitrogen dioxide</li> <li>Sulfur dioxide</li> <li>Ozone</li> <li>Carbon monoxide</li> <li>1,1,2,2-tetrachloroethane</li> <li>1,1,2-trichloroethane</li> <li>1,2-dibromo-3-chloropropane</li> <li>2,4-toluene diisocyanate</li> <li>2-chloroacetophenone</li> <li>2-nitropropane</li> <li>4-nitrophenol</li> <li>Acetonitrile</li> <li>Acetophenone</li> <li>Acrolein</li> <li>Acrylic acid</li> <li>Antimony compounds</li> <li>Benzidine</li> <li>Benzyl chloride</li> <li>Beryllium compounds</li> <li>Biphenyl</li> <li>bis-2-ethylhexyl phthalate</li> <li>Bromform</li> <li>Cadmium compounds</li> <li>Carbon disulfide</li> <li>Carbon tetrachloride</li> <li>Carbon sulfide</li> <li>Chlorine</li> <li>Chlorobenzene</li> <li>Chloroform</li> <li>Chloroprene</li> <li>Chromium compounds</li> <li>Cresol/cresylic acid</li> <li>Cumene</li> <li>Cyanide compounds</li> <li>Dibutylphthalate</li> <li>Diesel engine emissions</li> <li>Dimethyl formamide</li> <li>Dimethyl phthalates</li> <li>Dimethyl sulfate</li> <li>Epichlorohydrin</li> <li>Ethyl acrylate</li> </ul> | <ul style="list-style-type: none"> <li>Ethyl chloride</li> <li>Ethylene dibromide</li> <li>Ethylene dichloride</li> <li>Ethylene glycol</li> <li>Ethylene oxide</li> <li>Ethylidene dichloride</li> <li>Glycol ethers</li> <li>Hexachlorobenzene</li> <li>Hexachlorobutadiene</li> <li>Hexachlorocyclopentadiene</li> <li>Hexane</li> <li>Hydrazine</li> <li>Hydrochloric acid</li> <li>Isophorone</li> <li>Lead compounds</li> <li>Manganese compounds</li> <li>Mercury compounds</li> <li>Methanol</li> <li>Methyl isobutyl ketone</li> <li>Methyl methacrylate</li> <li>Methyl chloride</li> <li>Methylhydrazine</li> <li>Methyl tert-butyl ether</li> <li>Nitrobenzene</li> <li>N,N-dimethylaniline</li> <li>o-toluidine</li> <li>Polycyclic organic matter/polycyclic aromatic hydrocarbons</li> <li>Pentachlorophenol</li> <li>Phosphine</li> <li>Phosphorus</li> <li>Polychlorinated biphenyls</li> <li>Propylene dichloride</li> <li>Propylene oxide</li> <li>Quinoline</li> <li>Selenium compounds</li> <li>Styrene</li> <li>Tetrachloroethylene</li> <li>Toluene</li> <li>Trichloroethylene</li> <li>Triethylamine</li> <li>Vinyl acetate</li> <li>Vinyl chloride</li> <li>Vinylidene chloride</li> </ul> | <ul style="list-style-type: none"> <li>1000 km of stream in county</li> <li>Industrial permits per 1000 km of stream in county</li> <li>Stormwater permits per 1000 km of stream in county</li> <li>Number of days closed per event in county, 2000-2005</li> <li>Number of days per contamination advisory event in county, 2000-2005</li> <li>Number of days per rain advisory event in county, 2000-2005</li> <li>Percent of population on self supply, average 2000 and 2005</li> <li>Percent of public supply population that is on surface water, average 2000 and 2005</li> <li>Calcium precipitation weighted mean</li> <li>Magnesium precipitation weighted mean</li> <li>Potassium precipitation weighted mean</li> <li>Sodium precipitation weighted mean</li> <li>Ammonium precipitation weighted mean</li> <li>Nitrate precipitation weighted mean</li> <li>Chloride precipitation weighted mean</li> <li>Sulfate precipitation weighted mean</li> <li>Total mercury deposition</li> <li>Percent of county in extreme or exceptional drought (intensity levels D3 and D4, respectively)</li> <li>Barium</li> <li>Cadmium</li> <li>Chromium</li> <li>Cyanide</li> </ul> | <ul style="list-style-type: none"> <li>Fluoride</li> <li>Mercury (inorganic)</li> <li>Nitrate</li> <li>Nitrite</li> <li>Selenium</li> <li>Antimony</li> <li>Beryllium</li> <li>Thallium</li> <li>Endrin</li> <li>Lindane</li> <li>Methoxychlor</li> <li>Toxaphene</li> <li>Dalapon</li> <li>di(2-ethylhexyl) adipate</li> <li>Oxamyl (Vydate)</li> <li>Simazine</li> <li>di(2-ethylhexyl) phthalate</li> <li>Picloram</li> <li>Dinoseb</li> <li>Hexachlorocyclopentadiene</li> <li>Carbofuran</li> <li>Alachlor</li> <li>Heptachlor</li> <li>Heptachlor epoxide</li> <li>2,4-Dichlorophenoxyacetic acid</li> <li>Hexachlorobenzene</li> <li>Benzo(a)pyrene</li> <li>Pentachlorophenol</li> <li>1,2,4-Trichlorobenzene</li> <li>Polychlorinated biphenyls</li> <li>1,2-Dibromo-3-chloropropane</li> <li>Ethylene dibromide</li> <li>Xylenes</li> <li>Chlordane</li> <li>Dichloromethane (Methylene chloride)</li> <li>1,2-Dichlorobenzene (o-Dichlorobenzene)</li> <li>1,4-Dichlorobenzene (p-Dichlorobenzene)</li> <li>Vinyl chloride</li> <li>1,1-Dichloroethylene</li> <li>trans-1,2-Dichloroethylene</li> <li>1,2-Dichloroethane (Ethylene dichloride)</li> <li>1,1,1-Trichloroethane</li> </ul> | <ul style="list-style-type: none"> <li>Carbon tetrachloride</li> <li>1,2-Dichloropropane</li> <li>Trichloroethylene</li> <li>1,1,2-Trichloroethane</li> <li>Tetrachloroethylene</li> <li>Benzene</li> <li>Monochlorobenzene (Chlorobenzene)</li> <li>Toluene</li> <li>Ethylbenzene</li> <li>Styrene</li> <li>Alpha particles</li> <li>cis-1,2-Dichloroethylene</li> <li>Silvex</li> </ul> <p><b>LAND DOMAIN</b></p> <ul style="list-style-type: none"> <li>Harvested acreage</li> <li>Irrigated acreage</li> <li>Farms per acre</li> <li>Manure applied</li> <li>Chemicals used to control nematodes</li> <li>Chemicals used to control disease</li> <li>Chemicals used to detritate/control growth/in fruit</li> <li>Animal units</li> <li>Herbicides</li> <li>Fungicides</li> <li>Insecticides</li> <li>Arsenic</li> <li>Selenium</li> <li>Mercury</li> <li>Lead</li> <li>Zinc</li> <li>Copper</li> <li>Sodium</li> <li>Magnesium</li> <li>Calcium</li> <li>Iron</li> <li>Aluminum</li> <li>Phosphorus</li> <li>Facilities per county</li> <li>Radon zone</li> </ul> <p><b>SOCIODEMOGRAPHIC DOMAIN</b></p> <ul style="list-style-type: none"> <li>Median household income</li> <li>Percent persons with income below the poverty level</li> <li>Percent who do not report speaking English</li> <li>Percent earning greater than high school education</li> <li>Percent unemployed</li> <li>Percent work outside county</li> <li>Median number rooms per house</li> <li>Percent of housing with more than 10 units</li> <li>Mean number of violent crimes per capita</li> </ul> <p><b>BUILT DOMAIN</b></p> <ul style="list-style-type: none"> <li>Proportion of roads that are highways</li> <li>Proportion of roads that are primary streets</li> <li>Traffic fatality rate</li> <li>Percent of population using public transport</li> <li>Vice-related businesses</li> <li>Entertainment-related businesses</li> <li>Education-related businesses</li> <li>Negative-food-related businesses</li> <li>Positive-food-related businesses</li> <li>Health-care-related businesses</li> <li>Recreation-related businesses</li> <li>Transportation-related businesses</li> <li>Civic-related businesses</li> <li>Total subsidized housing units</li> </ul> |
